# Supplementary material for: Acute Effects of Brevetoxin-3 Administered via Oral Gavage to Mice
Source: MDPI journal article supplement (doi:10.3390/md21120644), 2023-12-16
Supplement: s1 [file s1]

# Report

**Analysis name:** BTX-3 muscle activity 2 sexes  
This report was generated by **Anonymous** on **8/7/2023 3:52:54 PM (CET)**. PROAST version 70.1

---

## Input values

|                          |           |
|--------------------------|-----------|
| Removed data             | No        |
| Type of response data    | Quantal   |
| Dose column(s)           | dose      |
| Response column(s)       | Incidence |
| Group size column(s)     | N         |
| Covariate column         | Sex       |
| Litter effect            | No        |
| BMR (CES)                | 0.1       |
| Model averaging          | Yes       |
| Number of bootstrap runs | 200       |
| AIC criterion            | 2         |

---

## Graphical output

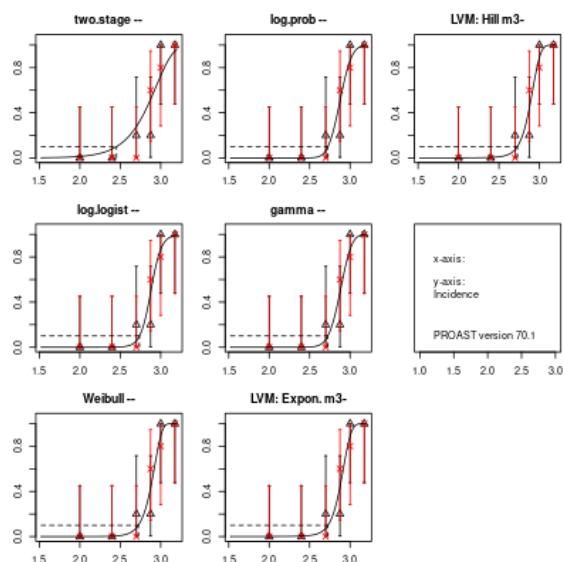

BMD confidence intervals based on MA

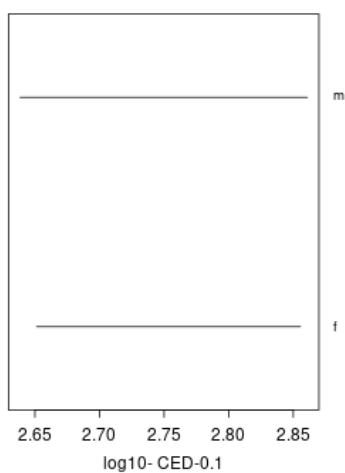

bootstrap curves  
based on model averaging

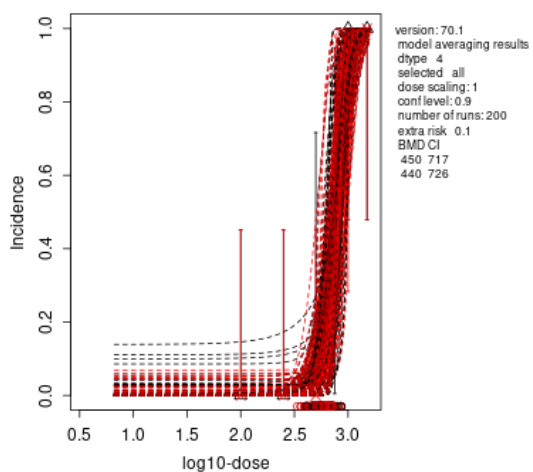

## Fitted models

| model      | No.par | loglik | AIC   | accepted | BMDL | BMDU | BMD | sens.subgr | conv |
|------------|--------|--------|-------|----------|------|------|-----|------------|------|
| null       | 1      | -40.38 | 82.76 | NA       | NA   | NA   | NA  | NA         | NA   |
| full       | 12     | -14.02 | 52.04 | NA       | NA   | NA   | NA  | NA         | NA   |
| two.stage  | 3      | -16.88 | 39.76 | no       | NA   | NA   | 284 | --         | yes  |
| log.logist | 3      | -13.67 | 33.34 | yes      | 411  | 702  | 546 | --         | yes  |
| Weibull    | 3      | -13.32 | 32.64 | yes      | 374  | 646  | 528 | --         | yes  |
| log.prob   | 3      | -13.65 | 33.3  | yes      | 407  | 704  | 533 | --         | yes  |

| model           | No.par | loglik | AIC   | accepted | BMDL | BMDU | BMD | sens.subgr | conv |
|-----------------|--------|--------|-------|----------|------|------|-----|------------|------|
| gamma           | 3      | -13.51 | 33.02 | yes      | 394  | 694  | 531 | --         | yes  |
| LVM: Expon. m3- | 3      | -13.36 | 32.72 | yes      | 379  | 665  | 534 | f          | yes  |
| LVM: Hill m3-   | 3      | -13.37 | 32.74 | yes      | 379  | 666  | 534 | f          | yes  |

---

## Model weights

| model      | weight |
|------------|--------|
| two.stage  | 0.0055 |
| log.logist | 0.1358 |
| Weibull    | 0.1926 |
| log.prob   | 0.1385 |
| gamma      | 0.1593 |
| EXP        | 0.1851 |
| HILL       | 0.1832 |

---

## BMD confidence interval based on model averaging

| Sex | BMDL | BMDU |
|-----|------|------|
| f   | 448  | 717  |
| m   | 435  | 726  |

---
