# Supplementary material for: Acute Effects of Brevetoxin-3 Administered via Oral Gavage to Mice
Source: Mar Drugs. 2023 Dec 16;21(12):644. doi: 10.3390/md21120644 (PMC10744354; doi:10.3390/md21120644)
Supplement: Supplementary file 1 [file marinedrugs-21-00644-s001.zip]

Archive with 4 entries (4 files):
- marinedrugs-2711672-Supplementary Figures S1-S4.pdf
- marinedrugs-2711672_Report S1_BMDL10 BTX-3 muscle activity for 2 sex.pdf
- marinedrugs-2711672_Revised-highlighted Table S1_raw data of principal study.xlsx
- marinedrugs-2711672_Table S2_raw data of pilot study.xlsx
