# Supplementary material for: Acute Effects of Brevetoxin-3 Administered via Oral Gavage to Mice
Source: Mar Drugs. 2023 Dec 16;21(12):644. doi: 10.3390/md21120644 (PMC10744354; doi:10.3390/md21120644)
Supplement: Supplementary file 1 [file marinedrugs-21-00644-s001.zip › marinedrugs-2711672_Revised-highlighted Table S1_raw data of principal study.xlsx]

## Sheet: Raw data
Dose of BTX-3 (µg/kg)		0
Sex of mice		Male					Female
Parameters	Time after gavage
Glucose (mg/dL)	T48h	140	244	247	196	276	146	184	223	221	289
Blood Urea Nitrogen (mg/dL)	T48h	16	16	23	16	19	19	16	11	17	16
Total bilirubin (mg/dL)	T48h	0.4	0.3	0.2	0.4	0.3	0.3	0.4	0.3	0.3	0.3
Albumin (g/dL)	T48h	2.1	1.9	2.2	2	1.8	2	2.4	2.2	2.1	2.1
Alanine aminotransferase (U/L)	T48h	99	46	62	201	29	50	118	93	33	48
Aspartate aminotransferase (U/L)	T48h	264	77	194	282	107	407	188	215	129	145
Creatine Kinase (U/L)	T48h	4868	836	3952	4430	1599	5000	3782	3631	1488	1742
Amylase (U/L)	T48h	672	715	756	663	680	778	698	571	684	738
Sodium (mM)	T48h	141	141	140	143	140	136	N/A	134	147	147
Potassium (mM)	T48h	6	5.3	5.5	6.1	5	5.6	N/A	5.6	5.3	4.8
Calcium (mg/dL)	T48h	9.7	9.2	9.8	9.4	9.2	9.3	9.8	9.2	9.3	9.1
Brain weight (g)	T48h	0.48	0.6	0.46	0.55	0.41	0.48	0.45	0.43	0.46	0.49
Heart weight (g)	T48h	0.2	0.23	0.14	0.18	0.13	0.11	0.14	0.12	0.11	0.16
Lungs weight (g)	T48h	0.18	0.26	0.15	0.21	0.17	0.18	0.11	0.16	0.13	0.14
Liver weight (g)	T48h	2.03	2.25	1.96	1.73	2.15	1.54	1.58	2.15	1.37	1.47
Small intestin weight (g)	T48h	1.5	1.3	1.4	1.1	0.8	0.8	0.9	1.01	1.1	1.2
Large intestin weight (g)	T48h	0.4	0.51	0.35	0.42	0.36	0.26	0.23	0.33	0.4	0.31
Right kidney weight (g)	T48h	0.26	0.34	0.21	0.25	0.21	0.17	0.11	0.12	0.16	0.22
Left kidney weight (g)	T48h	0.23	0.33	0.21	0.22	0.23	0.14	0.11	0.18	0.19	0.15
Dose of BTX-3 (µg/kg)		100										Dose of BTX-3 (µg/kg)		250
Sex of mice		Male					Female					Sex of mice		Male					Female
Parameters	Time after gavage											Parameters	Time after gavage
Weight (g)	T0	27.5	26.2	25.5	26.4	23.9	23.3	24.4	23.3	19.9	23.3	Weight (g)	T0	31.2	27.1	26.4	24.7	27.9	24	25.1	23.7	22.7	23.1
	T24h	27.5	26.2	26.7	27.2	25.3	22.3	23.9	22.8	19.5	22.3		T24h	31.9	27.5	27.7	26.6	28.3	22.4	25.8	23.2	22.8	22.1
	T48h	28.03	27	27.8	27.9	26	23	23.9	22.9	19.8	22.2		T48h	31.8	28.2	29.2	26	27.1	23	25.4	22.5	23.1	20.7
Gain or Loss of weight (relative to T0)	T24h	0	0	4.70588	3.0303	5.85774	-4.29185	-2.04918	-2.14592	-2.01005	-4.29185	Gain or Loss of weight (relative to T0)	T24h	2.24359	1.47601	4.92424	7.69231	1.43369	-6.66667	2.78884	-2.1097	0.440529	-4.329
	T48h	1.92727	3.05344	9.01961	5.68182	8.78661	-1.28755	-2.04918	-1.71674	-0.502513	-4.72103		T48h	1.92308	4.05904	10.6061	5.26316	-2.86738	-4.16667	1.19522	-5.06329	1.76211	-10.3896
Temperature (C°)	T0	37.2	38.2	38.2	36.6	37.2	38.6	38.3	38.2	38.6	38.4	Temperature (C°)	T0	38	37.7	37.6	37.8	37.5	37.6	38	38.5	38.9	38.9
	T2h	37.6	38.4	37	37	38.1	37.2	37.6	37.5	38.3	37.5		T2h	37.6	37.4	37.4	36.8	36.8	37.2	37.1	37.3	38.2	38.3
	T24h	37.9	38.7	38.8	38.2	37	38.5	38.7	37.6	38.3	37.8		T24h	38.1	38.6	38.7	38.5	38.2	38.2	38.5	37.8	38.8	38.5
	T48h	39.3	38.9	38.5	37.7	37.2	39.1	37.6	37.3	37.9	37.8		T48h	38.7	38.7	39.1	38.1	38	38.7	37.3	37.7	38.1	37.9
Gain or Loss of temperature (relative to T0)	T2h	0.4	0.2	-1.2	0.4	0.9	-1.4	-0.7	-0.7	-0.3	-0.9	Gain or Loss of temperature (relative to T0)	T2h	-0.4	-0.3	-0.2	-1	-0.7	-0.4	-0.9	-1.2	-0.7	-0.6
	T24h	0.7	0.5	0.6	1.6	-0.2	-0.1	0.4	-0.6	-0.3	-0.6		T24h	0.1	0.9	1.1	0.7	0.7	0.6	0.5	-0.7	-0.1	-0.4
	T48h	2.1	0.7	0.3	1.1	0	0.5	-0.7	-0.9	-0.7	-0.6		T48h	0.7	1	1.5	0.3	0.5	1.1	-0.7	-0.8	-0.8	-1
Grade of grip test	T2h	1	1	1	1	1	1	1	1	1	1	Grade of grip test	T2h	1	1	1	1	1	1	1	1	1	1
	T24h	1	1	1	1	1	1	1	1	1	1		T24h	1	1	1	1	1	1	1	1	1	1
	T48h	1	1	1	1	1	1	1	1	1	1		T48h	1	1	1	1	1	1	1	1	1	1
Bottle weight (g)	T0	129.76	138.27	134.89	185.5	227.1	131.42	138.47	225.4	258.1	346.1	Bottle weight (g)	T0	137.12	137.33	136.1	207.7	205.3	138.7	136.35	233.3	363.3	335.7
	T24h	124.4	130.9	126.6	178.1	218.8	127	132.6	220	252.7	342.7		T24h	126.8	126.5	129.9	196.7	198.5	133.8	130.1	226.8	358.2	331.3
	T48h	120.1	123.6	117.3	171.1	211.6	123	124.3	214.7	248.2	338.9		T48h	118.8	117	121.4	186.9	192.5	125.2	122.1	220.7	353.4	327.6
Water intake (mL/24h)	T24h	5.36	7.37	8.29	7.4	8.3	4.42	5.87	5.4	5.4	3.4	Water intake (mL/24h)	T24h	10.32	10.83	6.2	11	6.8	4.9	6.25	6.5	5.1	4.4
	T48h	4.3	7.3	9.3	7	7.2	4	8.3	5.3	4.5	3.8		T48h	8	9.5	8.5	9.8	6	8.6	8	6.1	4.8	3.7
Grade of muscle activity	T2h	1	1	1	1	1	1	1	1	1	1	Grade of muscle activity	T2h	1	1	1	1	1	1	1	1	1	1
	T24h	1	1	1	1	1	1	1	1	1	1		T24h	1	1	1	1	1	1	1	1	1	1
	T48h	1	1	1	1	1	1	1	1	1	1		T48h	1	1	1	1	1	1	1	1	1	1
Grade of jaw / breathing	T2h	1	1	1	1	1	1	1	1	1	1	Grade of jaw / breathing	T2h	1	1	1	1	1	1	1	1	1	1
	T24h	1	1	1	1	1	1	1	1	1	1		T24h	1	1	1	1	1	1	1	1	1	1
	T48h	1	1	1	1	1	1	1	1	1	1		T48h	1	1	1	1	1	1	1	1	1	1
Grade of tremors	T2h	1	1	1	1	1	1	1	1	1	1	Grade of tremors	T2h	1	1	1	1	1	1	1	1	1	1
	T24h	1	1	1	1	1	1	1	1	1	1		T24h	1	1	1	1	1	1	1	1	1	1
	T48h	1	1	1	1	1	1	1	1	1	1		T48h	1	1	1	1	1	1	1	1	1	1
Glucose (mg/dL)	T48h	163		152	157	189	165	178	177	200	198	Glucose (mg/dL)	T48h	171	195	241	152	219	216	153	254	196	251
Blood Urea Nitrogen (mg/dL)	T48h	22		22	11	12	19	13	13	14	13	Blood Urea Nitrogen (mg/dL)	T48h	15	17	18	14	16	15	14	13	13	15
Total bilirubin (mg/dL)	T48h	0.3		0.3	0.2	0.3	0.2	0.2	0.2	0.2	0.2	Total bilirubin (mg/dL)	T48h	0.2	0.2	0.3	0.3	0.2	0.3	0.2	0.2	0.2	0.3
Albumin (g/dL)	T48h	2		1.6	1.6	1.8	1.7	1.8	1.7	1.8	1.8	Albumin (g/dL)	T48h	1.8	1.7	1.6	1.9	1.8	1.8	1.8	1.7	1.7	1.9
Alanine aminotransferase (U/L)	T48h	67		97	90	36	34	72	100	87	312	Alanine aminotransferase (U/L)	T48h	327	89	752	48	87	30	51	58	146	69
Aspartate aminotransferase (U/L)	T48h	87		91	203	102	146	184	296	130	678	Aspartate aminotransferase (U/L)	T48h	162	236	395	292	234	170	120	350	398	181
Creatine Kinase (U/L)	T48h	1021		1328	4594	2078	2966	3578	>5000	1631	N/A	Creatine Kinase (U/L)	T48h	2423	>5000	>5000	>5000	>5000	4121	2269	>5000	>5000	3388
Amylase (U/L)	T48h	859		854	662	696	833	798	719	673	689	Amylase (U/L)	T48h	786	774	748	688	808	758	773	652	727	764
Sodium (mM)	T48h	145		151	149	151	149	147	155	155	150	Sodium (mM)	T48h	152	152	156	145	153	147	151	150	150	156
Potassium (mM)	T48h	5.3		5.1	5	5.5	4.8	5.3	6	5.9	6.4	Potassium (mM)	T48h	5.6	4.9	5.8	4.7	6.1	5.3	5.6	6.1	6.3	4.6
Calcium (mg/dL)	T48h	9.6		9.1	9	9.4	8.9	9.4	9.2	9.2	9.2	Calcium (mg/dL)	T48h	9.7	9.9	8	9.7	9.3	9.4	9.6	9	9.2	9.4
Brain weight (g)	T48h (or *T4h)	0.4414	0.5249	0.5214	0.4718	0.4532	0.4634	0.4612	0.5132	0.4919	0.5125	Brain weight (g)	T48h (or *T4h)	0.5425	0.6155	0.5589	0.508	0.4723	0.4493	0.5222	0.4785	0.4376	0.4479
Heart weight (g)	T48h (or *T4h)	0.1953	0.1739	0.1738	0.1298	0.118	0.0598	0.1105	0.1119	0.1463	0.1584	Heart weight (g)	T48h (or *T4h)	0.1967	0.2724	0.2338	0.142	0.1275	0.092	0.1025	0.1382	0.1417	0.1368
Lungs weight (g)	T48h (or *T4h)	0.1994	0.1849	0.2036	0.1529	0.1395	0.1841	0.1285	0.141	0.1783	0.1769	Lungs weight (g)	T48h (or *T4h)	0.2211	0.2645	0.2604	0.1556	0.1682	0.1072	0.1583	0.175	0.1624	0.1666
Liver weight (g)	T48h (or *T4h)	2.0926	2.0147	1.8734	1.738	1.7416	1.55	1.5502	1.4443	1.1718	1.3917	Liver weight (g)	T48h (or *T4h)	2.0312	2.272	2.1452	1.9461	2.1198	1.4371	1.57	1.4954	1.5908	1.184
Small intestin weight (g)	T48h (or *T4h)	1.4147	1.238	1.408	1.2454	1.1756	0.81	1.0346	1.1266	1.0579	1.1881	Small intestin weight (g)	T48h (or *T4h)	1.4603	1.4212	1.1862	1.5196	1.2742	0.848	1.0032	1.084	1.1812	1.0594
Large intestin weight (g)	T48h (or *T4h)	0.3917	0.3568	0.3884	0.3578	0.3537	0.234	0.2621	0.3305	0.2907	0.3259	Large intestin weight (g)	T48h (or *T4h)	0.577	0.527	0.433	0.3333	0.3898	0.1476	0.3325	0.2541	0.3966	0.2603
Right kidney weight (g)	T48h (or *T4h)	0.3023	0.2602	0.2342	0.2058	0.1973	0.1492	0.1744	0.1812	0.1792	0.1949	Right kidney weight (g)	T48h (or *T4h)	0.2881	0.3481	0.3042	0.2193	0.2264	0.1319	0.092	0.1853	0.1838	0.1725
Left kidney weight (g)	T48h (or *T4h)	0.2992	0.2345	0.2259	0.1967	0.1957	0.1565	0.143	0.1811	0.1605	0.195	Left kidney weight (g)	T48h (or *T4h)	0.2847	0.329	0.2968	0.2198	0.2162	0.1076	0.1031	0.177	0.1744	0.1791
Dose of BTX-3 (µg/kg)		500										Dose of BTX-3 (µg/kg)		750
Sex of mice		Male					Female					Sex of mice		Male					Female
Parameters	Time after gavage											Parameters	Time after gavage
Weight (g)	T0	26.3	25.4	26.4	27.3	24.9	21.6	23.3	22.6	22.4	26.6	Weight (g)	T0	26	29.8	28	29.2	27.1	26.4	22.7	23.7	22.3	23.4
	T24h	27	25.9	27.4	28.1	26.6	20.5	22.7	23.2	22.2	26.5		T24h	25.8	29.3	29.4	30	26.2	26	22.4	23.4	22.2	20.9
	T48h	27.7	27.2	27.4	28.3	29.2	20.8	23.4	23.4	22.8	26.9		T48h	26.9	31.1	31.4	27.1	30.2	27.3	23.3	22.8	23.2	20.8
Gain or Loss of weight (relative to T0)	T24h	2.6616	1.9685	3.78788	2.9304	6.82731	-5.09259	-2.57511	2.65487	-0.892857	-0.37594	Gain or Loss of weight (relative to T0)	T24h	-0.769231	-1.67785	5	2.73973	-3.32103	-1.51515	-1.32159	-1.26582	-0.44843	-10.6838
	T48h	5.32319	7.08661	3.78788	3.663	17.2691	-3.7037	0.429185	3.53982	1.78571	1.12782		T48h	3.46154	4.36242	12.1429	-7.19178	11.4391	3.40909	2.64317	-3.79747	4.03587	-11.1111
Temperature (C°)	T0	37.6	37	38.7	37.2	37.1	38.8	38.1	38.9	39.1	37.7	Temperature (C°)	T0	37.7	37.1	37.4	38.2	38.2	37.5	39.3	37.7	38.4	38.6
	T2h	36.7	36.5	38	37.4	37.1	38.4	36.8	37.5	37.1	36.5		T2h	34.8	35.6	36.7	36.9	37.6	36.3	36.7	37.2	37.1	37.8
	T24h	38.2	38.6	38.6	37.4	37.8	38.4	38.7	37.7	38.4	38.4		T24h	38.1	38.8	38.6	38.6	37.7	38.2	38.6	38.4	38.3	37.5
	T48h	38.8	38.4	39	37.6	37.2	37.5	38.1	37.9	38.3	38.1		T48h	39.2	39.1	38.9	37.7	37.3	38.4	38.4	37.6	38.3	38.1
Gain or Loss of temperature (relative to T0)	T2h	-0.9	-0.5	-0.7	0.2	0	-0.4	-1.3	-1.4	-2	-1.2	Gain or Loss of temperature (relative to T0)	T2h	-2.9	-1.5	-0.7	-1.3	-0.6	-1.2	-2.6	-0.5	-1.3	-0.8
	T24h	0.6	1.6	-0.1	0.2	0.7	-0.4	0.6	-1.2	-0.7	0.7		T24h	0.4	1.7	1.2	0.4	-0.5	0.7	-0.7	0.7	-0.1	-1.1
	T48h	1.2	1.4	0.3	0.4	0.1	-1.3	0	-1	-0.8	0.4		T48h	1.5	2	1.5	-0.5	-0.9	0.9	-0.9	-0.1	-0.1	-0.5
Grade of grip test	T2h	1	1	1	1	1	1	1	1	1	1	Grade of grip test	T2h	1	1	1	1	1	2	1	1	1	1
	T24h	1	1	1	1	1	1	1	1	1	1		T24h	1	1	1	1	1	1	1	1	1	1
	T48h	1	1	1	1	1	1	1	1	1	1		T48h	1	1	1	1	1	1	1	1	1	1
Bottle weight (g)	T0	137.96	136.11	130.44	208	203.2	139.67	124.13	321.1	238.9	228.7	Bottle weight (g)	T0	136.09	139.15	133.81	241.3	198.3	387.2	381.6	321	369.4	366.1
	T24h	132	128.6	122.5	198.7	194.3	135.4	106.7	315.2	233.5	221.9		T24h	128.2	132.6	125.4	234.9	192	382.7	377.3	315.6	365.1	363.2
	T48h	125.9	120	116.4	189.3	186.4	129.3	97.1	310.1	227.2	214.6		T48h	116.4	124.4	115.6	227.7	184	376.7	371.7	310.4	359.3	358.8
Water intake (mL/24h)	T24h	5.96	7.51	7.94	9.3	8.9	4.27	17.43	5.9	5.4	6.8	Water intake (mL/24h)	T24h	7.89	6.55	8.41	6.4	6.3	4.5	4.3	5.4	4.3	2.9
	T48h	6.1	8.6	6.1	9.4	7.9	6.1	9.6	5.1	6.3	7.3		T48h	11.8	8.2	9.8	7.2	8	6	5.6	5.2	5.8	4.4
Grade of muscle activity	T2h	1	1	1	1	1	1	1	1	1	1	Grade of muscle activity	T2h	2	1	2	1	2	2	1	1	1	1
	T24h	1	1	1	1	1	2	1	1	1	1		T24h	2	1	1	1	1	1	1	1	1	1
	T48h	1	1	1	1	1	1	1	1	1	1		T48h	1	1	1	1	1	1	1	1	1	1
Grade of jaw / breathing	T2h	1	1	1	1	1	1	1	1	1	1	Grade of jaw / breathing	T2h	2	1	2	1	1	1	1	1	1	1
	T24h	1	1	1	1	1	1	1	1	1	1		T24h	1	1	1	1	1	1	1	1	1	1
	T48h	1	1	1	1	1	1	1	1	1	1		T48h	1	1	1	1	1	1	1	1	1	1
Grade of tremors	T2h	1	1	1	1	1	1	1	1	1	1	Grade of tremors	T2h	1	1	1	1	1	1	1	1	1	1
	T24h	1	1	1	1	1	1	1	1	1	1		T24h	1	1	1	1	1	1	1	1	1	1
	T48h	1	1	1	1	1	1	1	1	1	1		T48h	1	1	1	1	1	1	1	1	1	1
Glucose (mg/dL)	T48h	155	134	159	147	132	149	250	187	236	N/A	Glucose (mg/dL)	T48h	205	170	176	218	231	209	187	189	187	205
Blood Urea Nitrogen (mg/dL)	T48h	21	16	17	13	14	18	13	15	10	N/A	Blood Urea Nitrogen (mg/dL)	T48h	18	19	17	12	12	14	15	12	17	14
Total bilirubin (mg/dL)	T48h	0.2	0.3	0.2	0.3	0.2	0.2	0.3	0.2	0.2	N/A	Total bilirubin (mg/dL)	T48h	0.2	0.3	0.3	0.3	0.3	0.3	0.2	0.2	0.2	0.3
Albumin (g/dL)	T48h	1.8	1.7	1.7	1.9	1.7	1.6	1.7	1.8	1.5	N/A	Albumin (g/dL)	T48h	1.7	1.8	1.7	1.9	2	1.5	1.5	1.8	1.9	1.9
Alanine aminotransferase (U/L)	T48h	55	462	25	104	332	174	51	212	36	N/A	Alanine aminotransferase (U/L)	T48h	135	77	97	62	25	51	167	193	33	114
Aspartate aminotransferase (U/L)	T48h	85	349	49	154	517	225	128	651	110	N/A	Aspartate aminotransferase (U/L)	T48h	195	102	147	217	75	60	482	708	167	192
Creatine Kinase (U/L)	T48h	1060	>5000	151	2992	>5000	4824	2287	N/A	2184	N/A	Creatine Kinase (U/L)	T48h	4437	1576	2110	4804	1080	499	>5000	N/A	2384	3427
Amylase (U/L)	T48h	837	689	800	545	619	682	684	700	600	N/A	Amylase (U/L)	T48h	791	647	777	714	736	559	649	610	794	839
Sodium (mM)	T48h	153	150	150	144	153	154	150	155	148	N/A	Sodium (mM)	T48h	150	147	148	150	142	146	151	151	152	154
Potassium (mM)	T48h	5.3	6	5.3	5.1	6.1	5.4	5.1	6.6	5.4	N/A	Potassium (mM)	T48h	5.8	4.9	5.1	5.8	5.1	4.2	5.9	6.1	5.6	5.7
Calcium (mg/dL)	T48h	9.7	9.9	8.9	9.4	9.2	8.5	9.6	9.9	8.9	N/A	Calcium (mg/dL)	T48h	9.5	9.4	9.7	9.6	9.4	9.3	8.8	8.9	9.2	9.6
Brain weight (g)	T48h (or *T4h)	0.449	0.4766	0.4406	0.486	0.4552	0.4342	0.4458	0.4602	0.4806	0.4318	Brain weight (g)	T48h (or *T4h)	0.4419	0.4854	0.4652	0.5362	0.467	0.4343	0.4603	0.4947	0.6142	0.4234
Heart weight (g)	T48h (or *T4h)	0.1749	0.119	0.1309	0.1469	0.1359	0.07	0.0711	0.1262	0.159	0.1732	Heart weight (g)	T48h (or *T4h)	0.1418	0.1417	0.1621	0.1897	0.156	0.0917	0.1199	0.1422	0.1258	0.1041
Lungs weight (g)	T48h (or *T4h)	0.1419	0.1751	0.1518	0.1512	0.1494	0.1084	0.1095	0.1749	0.1628	0.1903	Lungs weight (g)	T48h (or *T4h)	0.1368	0.1601	0.202	0.2102	0.1702	0.1273	0.1269	0.1729	0.286	0.1112
Liver weight (g)	T48h (or *T4h)	1.9384	1.9536	2.1972	1.9402	1.7117	1.2362	1.443	1.7331	1.319	1.467	Liver weight (g)	T48h (or *T4h)	2.0844	2.1654	2.0991	2.174	1.9473	1.4771	1.4845	1.4779	1.5401	1.0762
Small intestin weight (g)	T48h (or *T4h)	1.3575	1.1342	1.1079	1.2417	1.2332	0.8425	1.0328	1.1432	1.2476	0.9359	Small intestin weight (g)	T48h (or *T4h)	1.0876	0.937	1.2452	1.5961	1.1881	1.0302	1.0632	1.119	1.2951	0.7703
Large intestin weight (g)	T48h (or *T4h)	0.3576	0.3385	0.3745	0.3269	0.4356	0.244	0.3101	0.293	0.2845	0.3201	Large intestin weight (g)	T48h (or *T4h)	0.4227	0.2473	0.252	0.4487	0.3585	0.4018	0.3353	0.2711	0.3446	0.2806
Right kidney weight (g)	T48h (or *T4h)	0.1959	0.1847	0.2406	0.2109	0.1853	0.1089	0.119	0.1626	0.1836	0.1574	Right kidney weight (g)	T48h (or *T4h)	0.2172	0.254	0.2531	0.2693	0.2542	0.1734	0.1688	0.2008	0.182	0.1382
Left kidney weight (g)	T48h (or *T4h)	0.1865	0.1797	0.2227	0.2067	0.1663	0.1065	0.1253	0.1453	0.1814	0.1749	Left kidney weight (g)	T48h (or *T4h)	0.2292	0.2598	0.2696	0.2538	0.237	0.1372	0.1772	0.1867	0.1694	0.1396
Dose of BTX-3 (µg/kg)		1000										Dose of BTX-3 (µg/kg)		1500
Sex of mice		Male					Female					Sex of mice		Male					Female
Parameters	Time after gavage											Parameters	Time after gavage
Weight (g)	T0	28.9	26.4	26.2	27.2	29.6	26.9	23.2	25.8	20.9	24.8	Weight (g)	T0	27.2	26.4	30	25.1	26.2	25.6	23.5	23.8	24.4	25
	T24h	26.4	26.8	25.5	27.4	28.8	24.8	21.8	25.1	21	23.3		T24h	N/A	N/A	N/A	25.1	26.7	23.8	21.6	22	22.2	23.6
	T48h	28.5	27.8	27	27.2	28.5	26.3	22	25.5	21.7	24		T48h	N/A	N/A	N/A	27.2	26.3	22.9	22.1	23.7	21.6	24.5
Gain or Loss of weight (relative to T0)	T24h	-8.65052	1.51515	-2.67176	0.735294	-2.7027	-7.80669	-6.03448	-2.71318	0.478469	-6.04839	Gain or Loss of weight (relative to T0)	T24h	N/A	N/A	N/A	0	1.9084	-7.03125	-8.08511	-7.56303	-9.01639	-5.6
	T48h	-1.38408	5.30303	3.05344	0	-3.71622	-2.23048	-5.17241	-1.16279	3.82775	-3.22581		T48h	N/A	N/A	N/A	8.36653	0.381679	-10.5469	-5.95745	-0.420168	-11.4754	-2
Temperature (C°)	T0	37.7	38	38.4	38.4	38.4	38.8	39	38.5	39	39.1	Temperature (C°)	T0	38	38.3	38.4	38.1	39	38.9	39.1	39.4	38.8	39.2
	T2h	36.1	35.9	36.5	36.9	36.1	35.9	36.1	37	37.2	36.7		T2h	34.7	29.4	32.1	36.4	37.2	37.2	35.9	35.4	35.3	34.8
	T24h	37.7	37.6	37.5	37.1	38.4	38.3	39	38.4	38.6	38.6		T24h	N/A	N/A	N/A	37.9	37.9	38.2	38.2	37.7	37.9	38.4
	T48h	39.1	38.9	38.7	37.5	37.6	37.9	38	38.6	38.1	38.5		T48h	N/A	N/A	N/A	37.2	37	38.1	38.3	38.6	38.3	38
Gain or Loss of temperature (relative to T0)	T2h	-1.6	-2.1	-1.9	-1.5	-2.3	-2.9	-2.9	-1.5	-1.8	-2.4	Gain or Loss of temperature (relative to T0)	T2h	-3.3	-8.9	-6.3	-1.7	-1.8	-1.7	-3.2	-4	-3.5	-4.4
	T24h	0	-0.4	-0.9	-1.3	0	-0.5	0	-0.1	-0.4	-0.5		T24h	N/A	N/A	N/A	-0.2	-1.1	-0.7	-0.9	-1.7	-0.9	-0.8
	T48h	1.4	0.9	0.3	-0.9	-0.8	-0.9	-1	0.1	-0.9	-0.6		T48h	N/A	N/A	N/A	-0.9	-2	-0.8	-0.8	-0.8	-0.5	-1.2
Grade of grip test	T2h	2	2	1	1	1	1	1	1	1	1	Grade of grip test	T2h	3	3	3	1	1	1	1	1	1	1
	T24h	2	2	1	1	1	1	1	1	1	1		T24h	N/A	N/A	N/A	1	1	1	1	1	1	1
	T48h	1	1	1	1	1	1	1	1	1	1		T48h	N/A	N/A	N/A	1	1	1	1	1	1	1
Bottle weight (g)	T0	132.7	137.01	138.23	219.2	202.4	385	390	221.5	325.2	319.7	Bottle weight (g)	T0	139.14	136.28	140.57	189.2	234	386.8	381.5	308.2	198.2	224.8
	T24h	128.4	131.1	133.5	213.2	196.3	380.8	386.5	216.2	321.6	316		T24h	N/A	N/A	N/A	183.3	227.1	384	379.1	304.6	193.5	220.6
	T48h	119.8	123.7	127.1	205.3	190	374.2	382.6	209.6	315.7	309.2		T48h	N/A	N/A	N/A	174.4	220	381.2	374.3	298.4	189.2	215.2
Water intake (mL/24h)	T24h	4.3	5.91	4.73	6	6.1	4.2	3.5	5.3	3.6	3.7	Water intake (mL/24h)	T24h	N/A	N/A	N/A	5.9	6.9	2.8	2.4	3.6	4.7	4.2
	T48h	8.6	7.4	6.4	7.9	6.3	6.6	3.9	6.6	5.9	6.8		T48h	N/A	N/A	N/A	8.9	7.1	2.8	4.8	6.2	4.3	5.4
Grade of muscle activity	T2h	2	2	1	2	1	2	2	2	2	2	Grade of muscle activity	T2h	3	3	3	2	2	2	2	2	2	2
	T24h	2	1	2	1	1	1	1	1	1	1		T24h	N/A	N/A	N/A	1	1	1	1	2	2	2
	T48h	1	1	1	1	1	1	1	1	1	1		T48h	N/A	N/A	N/A	1	1	1	1	1	1	1
Grade of jaw / breathing	T2h	1	1	1	1	1	1	1	1	1	1	Grade of jaw / breathing	T2h	2	3	3	1	1	1	2	1	1	1
	T24h	1	1	1	1	1	1	1	1	1	1		T24h	N/A	N/A	N/A	1	1	1	1	1	1	1
	T48h	1	1	1	1	1	1	1	1	1	1		T48h	N/A	N/A	N/A	1	1	1	1	1	1	1
Grade of tremors	T2h	1	1	1	1	1	1	1	1	1	1	Grade of tremors	T2h	3	3	3	1	1	1	1	1	1	1
	T24h	1	1	1	1	1	1	1	1	1	1		T24h	N/A	N/A	N/A	1	1	1	1	1	1	1
	T48h	1	1	1	1	1	1	1	1	1	1		T48h	N/A	N/A	N/A	1	1	1	1	1	1	1
Glucose (mg/dL)	T48h	173	197	141	188	248	221	235	235	215	220	Glucose (mg/dL)	T48h	N/A	N/A	N/A	165	218	197	181	256	N/A	161
Blood Urea Nitrogen (mg/dL)	T48h	17	18	17	11	13	20	14	13	13	11	Blood Urea Nitrogen (mg/dL)	T48h	N/A	N/A	N/A	14	20	17	14	12	N/A	14
Total bilirubin (mg/dL)	T48h	0.2	0.3	0.3	0.3	0.2	0.2	0.3	0.3	0.3	0.3	Total bilirubin (mg/dL)	T48h	N/A	N/A	N/A	0.3	0.2	0.3	0.2	0.2	N/A	0.3
Albumin (g/dL)	T48h	1.6	1.7	1.7	1.7	1.7	1.9	1.8	1.7	1.6	1.6	Albumin (g/dL)	T48h	N/A	N/A	N/A	1.9	1.8	1.8	1.7	1.6	N/A	2
Alanine aminotransferase (U/L)	T48h	232	40	146	172	42	304	104	53	46	68	Alanine aminotransferase (U/L)	T48h	N/A	N/A	N/A	92	30	40	138	58	N/A	80
Aspartate aminotransferase (U/L)	T48h	258	93	247	378	173	549	159	191	164	103	Aspartate aminotransferase (U/L)	T48h	N/A	N/A	N/A	136	136	118	497	305	N/A	182
Creatine Kinase (U/L)	T48h	>5000	1463	3648	>5000	3713	>5000	2300	4270	3261	1430	Creatine Kinase (U/L)	T48h	N/A	N/A	N/A	3184	2755	1277	>5000	>5000	N/A	3608
Amylase (U/L)	T48h	760	713	731	512	735	855	674	629	611	607	Amylase (U/L)	T48h	N/A	N/A	N/A	727	934	665	577	586	N/A	765
Sodium (mM)	T48h	148	152	149	143	144	151	151	150	145	148	Sodium (mM)	T48h	N/A	N/A	N/A	145	141	151	151	148	N/A	150
Potassium (mM)	T48h	5.8	5.9	6.2	6.1	5.6	5.9	6	5.9	5.3	5.3	Potassium (mM)	T48h	N/A	N/A	N/A	5.5	5.4	5.3	6	5.2	N/A	5.3
Calcium (mg/dL)	T48h	9.5	9.7	9.3	9.7	9.9	9.2	9.4	9.6	9.6	9	Calcium (mg/dL)	T48h	N/A	N/A	N/A	10.1	10.1	9.3	9.2	9	N/A	9.6
Brain weight (g)	T48h (or *T4h)	0.5077	0.4861	0.4403	0.4321	0.3908	0.5097	0.4883	0.4071	0.4157	0.4469	Brain weight (g)	T48h (or *T4h)	0.5032*	0.5304*	N/A	0.461	0.4534	0.4966	0.485	0.4178	0.4529	0.4637
Heart weight (g)	T48h (or *T4h)	0.1699	0.1342	0.0924	0.1316	0.1514	0.164	0.1674	0.1184	0.0986	0.1378	Heart weight (g)	T48h (or *T4h)	0.1566*	0.1245*	0.1187*	0.1248	0.165	0.1614	0.1816	0.1105	0.1016	0.1032
Lungs weight (g)	T48h (or *T4h)	0.1776	0.1778	0.12	0.1536	0.1969	0.1754	0.1919	0.1441	0.1306	0.1486	Lungs weight (g)	T48h (or *T4h)	0.1924*	0.1974*	0.1591*	0.1864	0.1718	0.1977	0.1845	0.1306	0.1172	0.1754
Liver weight (g)	T48h (or *T4h)	2.3534	2.0205	1.9282	1.9857	1.8932	1.9208	1.4231	1.4097	1.191	1.4624	Liver weight (g)	T48h (or *T4h)	1.6087*	1.5567*	1.7304*	2.0225	1.8502	1.3819	1.5691	1.3724	1.3922	1.4692
Small intestin weight (g)	T48h (or *T4h)	0.8915	1.1986	0.886	1.3756	1.2926	1.0397	1.0689	1.215	0.9416	1.2652	Small intestin weight (g)	T48h (or *T4h)	1.2916*	1.1803*	1.43*	1.2522	1.3587	0.889	0.9628	1.0495	1.2731	1.015
Large intestin weight (g)	T48h (or *T4h)	0.2988	0.3405	0.3062	0.3834	0.3165	0.425	0.3385	0.329	0.2999	0.3139	Large intestin weight (g)	T48h (or *T4h)	0.3627*	0.3026*	0.3912*	0.2325	0.376	0.3119	0.3437	0.2945	0.2935	0.2673
Right kidney weight (g)	T48h (or *T4h)	0.2429	0.2309	0.1736	0.2221	0.2623	0.2262	0.2092	0.1672	0.1396	0.1641	Right kidney weight (g)	T48h (or *T4h)	0.1964*	0.2127*	0.2089*	0.186	0.2178	0.2127	0.2212	0.1682	0.1329	0.1458
Left kidney weight (g)	T48h (or *T4h)	0.2529	0.2201	0.1729	0.2192	0.2467	0.2231	0.1892	0.17	0.1372	0.1526	Left kidney weight (g)	T48h (or *T4h)	0.1922*	0.2056*	0.1988*	0.197	0.2372	0.2117	0.1791	0.1425	0.1371	0.1438
