# Supplementary material for: Acute Effects of Brevetoxin-3 Administered via Oral Gavage to Mice
Source: Mar Drugs. 2023 Dec 16;21(12):644. doi: 10.3390/md21120644 (PMC10744354; doi:10.3390/md21120644)
Supplement: Supplementary file 1 [file marinedrugs-21-00644-s001.zip › marinedrugs-2711672_Table S2_raw data of pilot study.xlsx]

## Sheet: Raw data
Dose of BTX-3 (µg/kg)		500		750		1000		2000
Sex of mice		Female
Parameters	Time after gavage
Weight (g)	T0	31.9	33.6	34.8	33.3	32	32.9	33.8
	T24h (D1)	31	32.9	34.2	32.4	27.45	30.8	Dead
	D2	31.7	33.9	34.3	32.7	32.2	32.2	Dead
	D3	32	33.9	35.2	N.D.	33.7	N.D.	Dead
	D4	31.8	33.9	34.2	33.5	34.5	32	Dead
	D5	N.D.	N.D.	N.D.	33.3	N.D.	32.1	Dead
	D6	30.4	33.8	34.3	34.2	33.9	32.3	Dead
	D7	31.79	34.1	34.1	N.D.	33.8	N.D.	Dead
	D8	32.1	34.1	34.6	33.4	34.4	32.6	Dead
	D9	N.D.	N.D.	N.D.	N.D.	N.D.	N.D.	Dead
	D10	31.3	33.8	32.6	N.D.	33.8	N.D.	Dead
	D11	N.D.	N.D.	N.D.	35.16	N.D.	34.21	Dead
	D12	N.D.	N.D.	N.D.	N.D.	N.D.	N.D.	Dead
	D13	32.99	35.51	34.64	N.D.	35.05	N.D.	Dead
	D14	32.18	34.32	33.4	35.41	34.79	35.39	Dead
Gain or Loss of weight (relative to T0)	T24h (D1)	-2.82132	-2.08333	-1.72414	-2.7027	-14.2188	-6.38298	Dead
	D2	-0.626959	0.892857	-1.43678	-1.8018	0.625	-2.12766	Dead
	D3	0.31348	0.892857	1.14943	N.D.	5.3125	N.D.	Dead
	D4	-0.31348	0.892857	-1.72414	0.600601	7.8125	-2.73556	Dead
	D5	N.D.	N.D.	N.D.	0	N.D.	-2.43161	Dead
	D6	-4.70219	0.595238	-1.43678	2.7027	5.9375	-1.82371	Dead
	D7	-0.344828	1.4881	-2.01149	N.D.	5.625	N.D.	Dead
	D8	0.626959	1.4881	-0.574713	0.3003	7.5	-0.911854	Dead
	D9	N.D.	N.D.	N.D.	N.D.	N.D.	N.D.	Dead
	D10	-1.88088	0.595238	-6.32184	N.D.	5.625	N.D.	Dead
	D11	N.D.	N.D.	N.D.	5.58559	N.D.	3.98176	Dead
	D12	N.D.	N.D.	N.D.	N.D.	N.D.	N.D.	Dead
	D13	3.41693	5.68452	-0.45977	N.D.	9.53125	N.D.	Dead
	D14	0.877743	2.14286	-4.02299	6.33634	8.71875	7.56839	Dead
Temperature (C°)	T0	37	37	37	36.4	37.1	36.5	37
	T2h	35.7	34.7	34.7	35.2	32.8	≤32	Dead
	T24h (D1)	36.9	36.1	37.7	36.6	34.7	37.1	Dead
	D2	37.7	37.4	37.6	36.7	37.4	36.8	Dead
	D3	N.D.	N.D.	N.D.	N.D.	N.D.	N.D.	Dead
	D4	37	36.9	36.7	37.9	37.2	37.1	Dead
	D5	N.D.	N.D.	N.D.	37.6	N.D.	35.7	Dead
	D6	36.8	37.2	37.7	36.7	37.5	36.4	Dead
	D7	36.6	35.7	36.8	N.D.	36.1	N.D.	Dead
	D8	37.3	36	36	37.4	36.6	37.3	Dead
	D9	N.D.	N.D.	N.D.	N.D.	N.D.	N.D.	Dead
	D10	36.6	36.9	36.7	N.D.	37.5	N.D.	Dead
	D11	N.D.	N.D.	N.D.	36.8	N.D.	37.6	Dead
	D12	N.D.	N.D.	N.D.	N.D.	N.D.	N.D.	Dead
	D13	37.7	36.1	36	N.D.	36.1	N.D.	Dead
	D14	36.4	36	36.8	36.5	36.6	37.2	Dead
Gain or Loss of temperature (relative to T0)	T2h	-1.3	-2.3	-2.3	-1.2	-4.3	<32°C	Dead
	T24h (D1)	-0.1	-0.9	0.7	0.2	-2.4	0.6	Dead
	D2	0.7	0.4	0.6	0.3	0.3	0.3	Dead
	D3	N.D.	N.D.	N.D.	N.D.	N.D.	N.D.	Dead
	D4	0	-0.1	-0.3	1.5	0.1	0.6	Dead
	D5	N.D.	N.D.	N.D.	1.2	N.D.	-0.8	Dead
	D6	-0.2	0.2	0.7	0.3	0.4	-0.1	Dead
	D7	-0.4	-1.3	-0.2	N.D.	-1	N.D.	Dead
	D8	0.3	-1	-1	1	-0.5	0.8	Dead
	D9	N.D.	N.D.	N.D.	N.D.	N.D.	N.D.	Dead
	D10	-0.4	-0.1	-0.3	N.D.	0.4	N.D.	Dead
	D11	N.D.	N.D.	N.D.	0.4	N.D.	1.1	Dead
	D12	N.D.	N.D.	N.D.	N.D.	N.D.	N.D.	Dead
	D13	0.7	-0.9	-1	N.D.	-1	N.D.	Dead
	D14	-0.6	-1	-0.2	0.1	-0.5	0.7	Dead
Grade of grip test	T0	1	1	1	1	1	1	Dead
	T2h	1	1	1	3	3	3	Dead
	T24h (D1)	1	1	1	1	2	1	Dead
	D2	1	1	1	1	1	1	Dead
	D3	1	1	1	N.D.	1	N.D.	Dead
	D4	1	1	1	1	1	1	Dead
	D5	N.D.	N.D.	N.D.	1	N.D.	1	Dead
	D6	1	1	1	1	1	1	Dead
	D7	1	1	1	N.D.	1	N.D.	Dead
	D8	1	1	1	1	1	1	Dead
	D9	N.D.	N.D.	N.D.	N.D.	N.D.	N.D.	Dead
	D10	1	1	1	N.D.	1	N.D.	Dead
	D11	N.D.	N.D.	N.D.	1	N.D.	1	Dead
	D12	N.D.	N.D.	N.D.	N.D.	N.D.	N.D.	Dead
	D13	1	1	1	N.D.	1	N.D.	Dead
	D14	1	1	1	1	1	1	Dead
Bottle weight (g)	T0	377	396.6	384.7	367.7	376.6	379.7	380.6
	T24h (D1)	374.1	393.3	379.4	365.9	376.6	378.9	Dead
	D2	369.8	388.4	373.5	361.7	370.9	372.8	Dead
	D3	364.1	383.6	366.7	N.D.	365.1	N.D.	Dead
	D4	358.7	378.2	358.5	348.8	358.5	360.1	Dead
	D5	N.D.	N.D.	N.D.	344	N.D.	353.9	Dead
	D6	346	365.5	338.5	338.7	345.3	347.7	Dead
	D7	340.2	359.2	331.3	N.D.	339.6	N.D.	Dead
	D8	334.5	353.6	322.3	329.5	334.2	334.9	Dead
	D9	N.D.	N.D.	N.D.	N.D.	N.D.	N.D.	Dead
	D10	322.8	342.1	303.2	N.D.	321.7	N.D.	Dead
	D11	N.D.	N.D.	N.D.	314.8	N.D.	319.2	Dead
	D12	N.D.	N.D.	N.D.	N.D.	N.D.	N.D.	Dead
	D13	308.5	324.3	275.8	N.D.	306.3	N.D.	Dead
	D14	302.4	317.6	264.5	300.9	300.1	298.7	Dead
Water intake (mL/24h)	T24h (D1)	2.9	3.3	5.3	1.8	0	0.8	Dead
	D2	4.3	4.9	5.9	4.2	5.7	6.1	Dead
	D3	5.7	4.8	6.8	N.D.	5.8	N.D.	Dead
	D4	5.4	5.4	8.2	6.45	6.6	6.35	Dead
	D5	N.D.	N.D.	N.D.	4.8	N.D.	6.2	Dead
	D6	6.35	6.35	10	5.3	6.6	6.2	Dead
	D7	5.8	6.3	7.2	N.D.	5.7	N.D.	Dead
	D8	5.7	5.6	9	4.6	5.4	6.4	Dead
	D9	N.D.	N.D.	N.D.	N.D.	N.D.	N.D.	Dead
	D10	5.85	5.75	9.55	N.D.	6.25	N.D.	Dead
	D11	N.D.	N.D.	N.D.	4.9	N.D.	5.23333	Dead
	D12	N.D.	N.D.	N.D.	N.D.	N.D.	N.D.	Dead
	D13	4.76667	5.93333	9.13333	N.D.	5.13333	N.D.	Dead
	D14	6.1	6.7	11.3	4.63333	6.2	6.83333	Dead
Observation of abnormal symptomatology	T0 to T4h	Nothing to report	Nothing to report	Nothing to report	Nothing to report	T 40 min: mild posterior paralysis ; T 82 min: posterior paralysis and front legs crossed.	T 20 min: front legs crossed and hind legs spread ; T 25 min: compulsive jaw movements ; T 50 min: abnormal breathing.	T12 min: posterior paralysis ; T14 min: loss of balance ; T17 min: front legs crossed ; T50 min: body stiffening ; T1 h: death.
	T24h (D1)	Nothing to report	Nothing to report	Nothing to report	Nothing to report	Nothing to report	Nothing to report	Dead
	D2 to D14	Nothing to report	Nothing to report	Nothing to report	Nothing to report	Nothing to report	Nothing to report	Dead
Glucose (mg/dL)	D14	162	179	232	206	265	205	Dead
Blood Urea Nitrogen (mg/dL)	D14	11	12	13	14	12	16	Dead
Total bilirubin (mg/dL)	D14	0.4	0.3	0.3	0.3	0.3	0.3	Dead
Albumin (g/dL)	D14	1.9	2	2.1	2	2.1	2	Dead
Alanine aminotransferase (U/L)	D14	66	23	84	26	109	33	Dead
Aspartate aminotransferase (U/L)	D14	316	109	308	79	241	176	Dead
Creatine Kinase (U/L)	D14	>5000	1195	>5000	723	3664	2848	Dead
Amylase (U/L)	D14	638	810	745	937	810	841	Dead
Sodium (mM)	D14	148	145	141	141	140	137	Dead
Potassium (mM)	D14	4.7	4.8	5.2	5.3	5.3	4.9	Dead
Calcium (mg/dL)	D14	9.1	9.1	9.4	9.2	9.8	9.9	Dead
Brain weight (g)	D14	N.D.	N.D.	N.D.	0.554	N.D.	0.542	Dead
Heart weight (g)	D14	N.D.	N.D.	N.D.	0.24	N.D.	0.214	Dead
Lungs weight (g)	D14	N.D.	N.D.	N.D.	0.244	N.D.	0.207	Dead
Liver weight (g)	D14	N.D.	N.D.	N.D.	2.106	N.D.	2.175	Dead
Small intestin weight (g)	D14	N.D.	N.D.	N.D.	N.D.	N.D.	N.D.	Dead
Large intestin weight (g)	D14	N.D.	N.D.	N.D.	N.D.	N.D.	N.D.	Dead
Right kidney weight (g)	D14	N.D.	N.D.	N.D.	0.276	N.D.	0.245	Dead
Left kidney weight (g)	D14	N.D.	N.D.	N.D.	0.291	N.D.	0.241	Dead
